# Supplementary material for: Glutathione Depletion Disrupts Redox Homeostasis in an Anoxia-Tolerant Invertebrate
Source: MDPI journal article supplement (doi:10.3390/antiox12061197), 2023-05-31
Supplement: s1 [file s1]

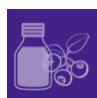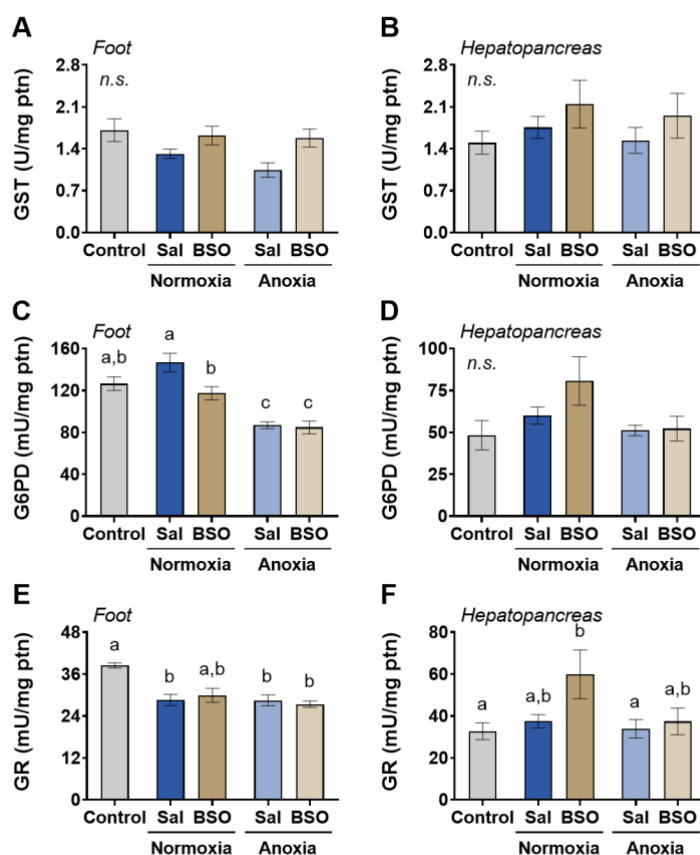

**Figure S1.** Activity of accessory enzymes of antioxidant systems in foot muscle and hepatopancreas of *Helix aspersa* snails, injected with saline or buthionine sulfoximine and maintained in normoxia or exposed to anoxia. Control animals were maintained in normoxia and not injected with any substance. (A) Glutathione transferase (GST) activity in foot muscle (N = 5–7). (B) Glutathione transferase (GST) activity in hepatopancreas (N = 5–8). (C) Glucose 6-phosphate dehydrogenase (G6PD) activity in foot muscle (N = 5–7). (D) Glucose 6-phosphate dehydrogenase (G6PD) activity in hepatopancreas (N = 6–8). (E) Glutathione reductase (GR) activity in foot muscle (N = 5–7). (F) Glutathione reductase (GR) activity in hepatopancreas (N = 6–8). Groups that do not share letters are significantly different from each other ( $p < 0.05$ ).
